# Supplementary material for: Vertically Transmitted Epichloë Systemic Endophyte Enhances Drought Tolerance of Achnatherum inebrians Host Plants through Promoting Photosynthesis and Biomass Accumulation
Source: MDPI journal article supplement (doi:10.3390/jof8050512), 2022-05-16
Supplement: s1 [file s1]

## Supplementary Materials

### Supplementary for Material and Methods

#### Sampling, DNA extraction, quantification and qualification

Total RNA was extracted from the 100 mg fresh leaves of *Epichloë* symbiotic (EI) and non-symbiotic (EF) drunken horse grass (DHG) plants using Trizol reagent as per the manufacturer's instructions (Invitrogen, USA). The purity and concentration of RNA was checked using a NanoPhotometer® spectrophotometer (IMPLEN, CA, USA), and the integrity of RNA was assessed using the RNA Nano 6000 Assay Kit of the Agilent Bioanalyzer 2100 system (Agilent Technologies, CA, USA). RNA concentration was measured using the Qubit® RNA Assay Kit in a Qubit®2.0 Fluorometer (Life Technologies, CA, USA).

#### cDNA library construction and RNA sequencing

Transcriptome analysis in this present study was performed in the Biomarker Technologies (Beijing, China). A total amount of 3 µg RNA per sample was used as input material for the preparations of RNA sample. Sequencing libraries were generated using the NEBNext®Ultra™ RNA Library Prep Kit for Illumina® (NEB, USA). Afterwards, the libraries were sequenced by Illumina HiSeq 2000 platform.

In brief, mRNA was purified from total RNA using poly-T oligo-attached magnetic beads, and then random hexamer primer and M-M uLV Reverse Transcriptase (RNase H-) were used for the first strand cDNA synthesis. Second strand cDNA was synthesized using DNA Polymerase I and RNase H. Remaining overhangs were converted into blunt ends via exonuclease/polymerase activities. After adenylation of 3' ends of DNA fragments, NEBNext Adaptors with hairpin loop structures were ligated prior to hybridization. cDNA fragments of 150~200 bp in length were purified using the AMPure XP system (Beckman Coulter, Beverly, USA). Then 3 µl USER Enzyme (NEB, USA) was used with size-selected, adaptor-ligated cDNA at 37°C for 15 min followed by 5 min at 95°C before PCR. PCR was performed with Phusion High-Fidelity DNA polymerase, Universal PCR primers and Index (X) Primer. PCR products were purified (AMPure XP system) and library quality was assessed on the Agilent Bioanalyzer 2100 system (Agilent, USA).

#### Sequence filtering, assembly and annotation

The clustering of the barcoded samples was performed on a cBot Cluster Generation System using the TruSeq PE Cluster Kit v3-cBot-HS (Illumina) according to the manufacturer's instructions. After cluster generation, the library preparations were sequenced on an Illumina HiSeq 2000 platform and paired-end reads were generated. Raw data (raw reads) of fastq format were firstly processed through in-house perl scripts to remove low quality reads. Reads removing adapters and poly-Ns were obtained as the clean reads (=138.42 Gb, Q30 > 89.1%) with high quality. The Do novo transcriptome assembly of these clean reads into 92 964 unigenes (N50 of 1 677 bp) were accomplished using TRINITY (v2.11.0) program (Grabherr *et al.*, 2011) with set parameters (min\_kmer\_cov set to 2). Clean data were mapped back onto the assembled transcriptome; read count for each gene was obtained from the mapping results.

#### Meta-analysis

Papers in journals were collected from the Web of Science and the China National Knowledge Infrastructure (CNKI) databases during July 2020. These papers were searched with the keywords “*Epichloë*/endophyte/photosynthesis”. A total of 26 papers in English and 223 papers in Chinese were located, and then the following criteria were used to select the appropriate papers.

- 1) The host plants of are the cool-season grass species. Here, a total of 21 papers in English and 78 papers in Chinese were selected for the next selection, respectively.
- 2) The references of these selected papers were also checked to search for further appropriate papers. Eight additional papers in English were obtained for obtaining data.
- 3) The selected papers had to include the means of net photosynthetic rate for both the endophyte-

infected and endophyte-free grasses. Here a total of 45 papers including 14 papers in English and 31 papers in Chinese were selected for the present meta-analysis.

The extract values of these selected papers were obtained from the graph using GetData Graph Digitizer 2.22 (<http://getdata-graph-digitizer.com/>). A total of 277 observations of photosynthetic efficiency, 29 observations of water use efficiency and 22 observations of photochemical efficiency. The mean, standard deviations (= standard errors  $\times \sqrt{n}$ , and the unreported standard deviations was estimated with the 10% of the mean) and number of repetitions ( $n$ ) of endophyte-infected (experimental group) and endophyte-free (control group) were extracted from the 45 selected papers. The meta-analysis was performed through the MetaWin software (version 2.1) according to Hedges *et al.* (1999), and the effects of *Epichloë* endophytes on the net photosynthetic efficiency were calculated through log of the response ratio ( $\ln R$ ) using the formula (Hedges *et al.*, 1999). The variance of the natural logarithm of the response ratio ( $\ln R(v)$ ) was approximated by the equation [2].

$$\ln R = \ln\left(\frac{\bar{X}_e}{\bar{X}_c}\right) = \ln(\bar{X}_e) - \ln(\bar{X}_c) \quad [1]$$

Where  $\bar{X}_e$  and  $\bar{X}_c$  represent the mean net photosynthetic efficiency in the experimental group and control group, respectively.

$$\ln R(v) = \frac{S_e^2}{n_e \bar{X}_e^2} + \frac{S_c^2}{n_c \bar{X}_c^2} \quad [2]$$

Where  $n_e$  and  $n_c$  indicate the repetitions of the experimental group and control group, respectively, and  $S_e^2$  and  $S_c^2$  indicate the standard deviations of experimental group and control group, respectively (Gurevitch *et al.*, 2001). The  $\ln R$  mean of the effects of *Epichloë* endophytes presence on the net photosynthetic efficiency was calculated with the combination of  $\ln R$  and  $\ln R(v)$ , and the  $\ln R(v)$  was weighted by the inverse variance of the  $\ln R$  for each observation. The 95% bootstrap confidence intervals for the mean  $\ln R$  were calculated by 9999 iterations of bootstrapping according to a previous study (Gurevitch *et al.*, 2001).

**Table S1:** Selected unigenes associated with processes of photosynthesis and photosynthesis-antenna proteins identified in the RNA-seq analysis in the present study.

| No.             | Primers (5'-3')        |                        |
|-----------------|------------------------|------------------------|
|                 | Forward                | Reverse                |
| c61885.graph_c1 | GCAGGTGCGCATATTGTGTT   | ACATGGAATGCGCCAAAACC   |
| c59956.graph_c0 | AACCGGGGTCGTGGTAAATC   | GCAATAGAGAGCGAACGGGA   |
| c51264.graph_c3 | CTGGGGACCAATCACAATCCA  | ATCCTGCAGCCGGAATGAG    |
| c47798.graph_c0 | GTGAAAAAGGCTGCACCGAA   | AAACCCAAGCATGGCAACAC   |
| c57444.graph_c0 | ACAAGATATCAGGCACCCCC   | AGCAAACGAGAGGAGATGGG   |
| c60128.graph_c1 | ACAGCACGTACTTCCACGAC   | GGCAGACGTTGTGAGAATGC   |
| c54875.graph_c1 | CATAGTGACGCTTGAGCCGA   | ACAGCACGTACTTCCACGAC   |
| c58037.graph_c0 | GCCACGAAATAAGAGCGGTG   | CACTCGTCGTGAAGCTGGTA   |
| c51322.graph_c1 | GTAGTTGTTCGTGACACGC    | TTGATCAGGACCCCAACACC   |
| c47792.graph_c0 | CTCAGGGACTGCTTTGACGA   | GCCAAAGATCGATGGCGATG   |
| c61616.graph_c4 | GTCGGAAAGGTCACCGTCAA   | TTCTCTGCTCAACTCGTCGG   |
| c52166.graph_c0 | ATGCGCCTGAAGACACCTAC   | AAGGAAGGAACCCCTCCGACT  |
| c47702.graph_c0 | GAGGTCGGAAGTTGGGGTAAG  | CGACGTCTACATCCTCGACC   |
| c45025.graph_c0 | ATGTCTGTTTCAGCAGGCGAG  | TGGAGCATTAGGGCCTACCA   |
| c51525.graph_c1 | GTTGCACGGACATGCAGAAG   | CGTAACAAAGCATGGAGCGG   |
| c46095.graph_c0 | GATCTTTGGCCACCCGTTCT   | CGAGAGGGCTGTGTACCTTC   |
| c57544.graph_c0 | CACGACCACGTTGAGGAAGT   | AGTTCTTCGACAACCCGACC   |
| c19569.graph_c0 | CCTCTAGCTCACGTTCTTGG   | GTTCCCTGGTGACTATGGGTG  |
| c33081.graph_c0 | CTGCTTGAGGCAACCTGCT    | CTTGCCCTCGGCTCTCTTTG   |
| c36282.graph_c0 | GCGGTTCTTGCGAATGTTT    | ATACCTTGGTCCGCTGTCTG   |
| c47622.graph_c0 | CGAGAACCTTTCCGACCACA   | ATCGATCCCCGTAGTCCACA   |
| c56765.graph_c1 | CTCCGGTCTTAGAGGAGCAA   | CGATGATGGCAGGTTCTTCAC  |
| c56765.graph_c3 | CCTTGCCTAAACCTAACACAGC | GGTGTGGAGATGGAGAGAACAA |
| c58363.graph_c2 | CTGACCACATCACTGACCCC   | CCTCGTTGACGCCTCACTT    |
| c60825.graph_c3 | TCACTGGCAAAGGACCCATC   | GAAAGCCCATGCGTTGTTGT   |
| c64087.graph_c0 | GTGAAATCGTCGACCCACTCT  | TGAAGGAGATCAAGAACGGGC  |
| c65061.graph_c0 | GCAAGTTCTTCACCGCCTTG   | TGGAGAACACACACGACACC   |
| c60825.graph_c0 | GATCTCAGGGAACACGCACC   | GCTGACCCAGAGACTTTCGC   |
| c60825.graph_c2 | ATGAACCATCGGTGCCTGTT   | AGGGCTAAGGCAACTCCAAC   |
| c54664.graph_c2 | CTTCGACCACCTTGACGACC   | GCATGGTTGCACACACAAGAG  |
| c47083.graph_c1 | TCCATGCTCGGGTTCTTCATC  | TGATCGACGGCGAGCTTACA   |
| c47083.graph_c2 | TCCAGGAACTTCTCCGTTGAG  | GAGCTCGCGAAGTGGTATGG   |
| c46715.graph_c0 | AAGATTTCCCCCTCCCCGAT   | TGCGTGCAAGTCCCTTCTT    |

**Table S2:** The comparative statistics between RNA sequencing clean data and transcriptome assembly of *Epichloë* symbiotic (EI) and non-symbiotic (EF) *Achnatherum inebrians* plants under normal (CK), moderate (MD) and severe (SD) drought treatments

| Samples | Clean Reads | Mapped Reads | Mapped Ratio |
|---------|-------------|--------------|--------------|
| SD EI-1 | 22 052 990  | 14 876 490   | 67.46%       |
| SD EI-2 | 21 226 790  | 13 771 783   | 64.88%       |
| SD EI-3 | 22 465 222  | 15 571 287   | 69.31%       |
| SD EF-1 | 27 212 504  | 19 301 399   | 70.93%       |
| SD EF-2 | 26 178 474  | 18 146 737   | 69.32%       |
| SD EF-3 | 39 651 336  | 26 870 420   | 67.77%       |
| MD EI-1 | 22 110 964  | 15 393 963   | 69.62%       |
| MD EI-2 | 23 504 857  | 16 490 267   | 70.16%       |
| MD EI-3 | 25 358 881  | 16 704 233   | 65.87%       |
| MD EF-1 | 30 351 249  | 20 040 455   | 66.03%       |
| MD EF-2 | 21 265 647  | 14 344 483   | 67.45%       |
| MD EF-3 | 24 703 922  | 16 965 005   | 68.67%       |
| CK EI-1 | 25 570 343  | 17 215 380   | 67.33%       |
| CK EI-2 | 22 544 277  | 15 544 096   | 68.95%       |
| CK EI-3 | 23 406 498  | 15 850 119   | 67.72%       |
| CK EF-1 | 25 619 757  | 17 562 006   | 68.55%       |
| CK EF-2 | 22 198 415  | 15 062 681   | 67.85%       |
| CK EF-3 | 37 489 169  | 25 091 217   | 66.93%       |
| Total   | 462 911 295 | 314 802 021  | 68.00%       |

**Table S3:** Length distribution of transcripts and unigenes of *Achnatherum inebrians* plants

| Length distribution of transcripts and Unigenes | Transcript      | Unigene         |
|-------------------------------------------------|-----------------|-----------------|
| 200-300                                         | 36 501 (14.87%) | 29 529 (31.76%) |
| 300-500                                         | 37 129 (15.13%) | 22 216 (23.90%) |
| 500-1000                                        | 52 080 (21.22%) | 19 511 (20.99%) |
| 1000-2000                                       | 60 242 (24.54%) | 10 940 (11.77%) |
| ≥2000                                           | 59 519 (24.25%) | 10 768 (11.58%) |
| Total Number                                    | 245 471         | 92 964          |
| Total Length                                    | 338 709 144     | 80 431 027      |
| N50 Length                                      | 2 230           | 1 677           |
| Mean Length                                     | 1379.83         | 865.18          |

**Table S4:** Unigenes statistics of *Achnatherum inebrians* plants transcriptome against eight different public databases.

| Annotated Database   | Annotated Number | Percentage (%) |
|----------------------|------------------|----------------|
| COG Annotation       | 12 338           | 13.27          |
| GO Annotation        | 25 308           | 27.22          |
| KEGG Annotation      | 12 455           | 13.40          |
| KOG Annotation       | 22 499           | 24.20          |
| Pfam Annotation      | 27 008           | 29.05          |
| Swissprot Annotation | 20 642           | 22.20          |
| eggnoG Annotation    | 38 995           | 41.95          |
| Nr Annotation        | 36 831           | 39.62          |
| All Annotated        | 42 618           | 45.84          |

**Table S5:** The ANOVA table showing the effects of symbiosis status and soil moisture levels on the growth partners, biomass and photosynthetic indices of *Achnatherum inebrians* plants

| Response variable                                                                                       | Treatments                | <i>df(n,d)</i> | F       | <i>P</i> -value |
|---------------------------------------------------------------------------------------------------------|---------------------------|----------------|---------|-----------------|
| Plant height (cm)<br>( <i>n</i> = 9)                                                                    | Symbiosis                 | 1,48           | 961.156 | < <b>0.001</b>  |
|                                                                                                         | Soil moisture             | 2,48           | 101.071 | < <b>0.001</b>  |
|                                                                                                         | Symbiosis x Soil moisture | 2,48           | 17.274  | < <b>0.001</b>  |
| Shoot fresh weight (g)<br>( <i>n</i> = 9)                                                               | Symbiosis                 | 1,48           | 273.880 | < <b>0.001</b>  |
|                                                                                                         | Soil moisture             | 2,48           | 504.240 | < <b>0.001</b>  |
|                                                                                                         | Symbiosis x Soil moisture | 2,48           | 23.610  | < <b>0.001</b>  |
| Root fresh weight (g)<br>( <i>n</i> = 9)                                                                | Symbiosis                 | 1,48           | 48.470  | < <b>0.001</b>  |
|                                                                                                         | Soil moisture             | 2,48           | 555.300 | < <b>0.001</b>  |
|                                                                                                         | Symbiosis x Soil moisture | 2,48           | 8.830   | < <b>0.001</b>  |
| Shoot dry weight (g)<br>( <i>n</i> = 9)                                                                 | Symbiosis                 | 1,48           | 178.356 | < <b>0.001</b>  |
|                                                                                                         | Soil moisture             | 2,48           | 14.707  | < <b>0.001</b>  |
|                                                                                                         | Symbiosis x Soil moisture | 2,48           | 3.470   | 0.076           |
| Root dry weight (g)<br>( <i>n</i> = 9)                                                                  | Symbiosis                 | 1,48           | 21.966  | < <b>0.001</b>  |
|                                                                                                         | Soil moisture             | 2,48           | 59.940  | < <b>0.001</b>  |
|                                                                                                         | Symbiosis x Soil moisture | 2,48           | 1.446   | 0.246           |
| Intercellular CO <sub>2</sub><br>concentration<br>(CO <sub>2</sub> mmol <sup>-1</sup> ) ( <i>n</i> = 9) | Symbiosis                 | 1,48           | 20.156  | < <b>0.001</b>  |
|                                                                                                         | Soil moisture             | 2,48           | 37.710  | < <b>0.001</b>  |
|                                                                                                         | Symbiosis x Soil moisture | 2,48           | 9.777   | < <b>0.001</b>  |
| Transpiration rate<br>(mmol H <sub>2</sub> O m <sup>-2</sup> s <sup>-1</sup> )<br>( <i>n</i> = 9)       | Symbiosis                 | 1,48           | 4.393   | <b>0.041</b>    |
|                                                                                                         | Soil moisture             | 2,48           | 49.761  | < <b>0.001</b>  |
|                                                                                                         | Symbiosis x Soil moisture | 2,48           | 16.401  | <b>0.003</b>    |
| Stomatol condutance<br>(mmol H <sub>2</sub> O m <sup>-2</sup> s <sup>-1</sup> )<br>( <i>n</i> = 9)      | Symbiosis                 | 1,48           | 7.303   | <b>0.009</b>    |
|                                                                                                         | Soil moisture             | 2,48           | 78.276  | < <b>0.001</b>  |
|                                                                                                         | Symbiosis x Soil moisture | 2,48           | 6.117   | <b>0.004</b>    |

Note: Statistically significant effects are highlighted in bold.

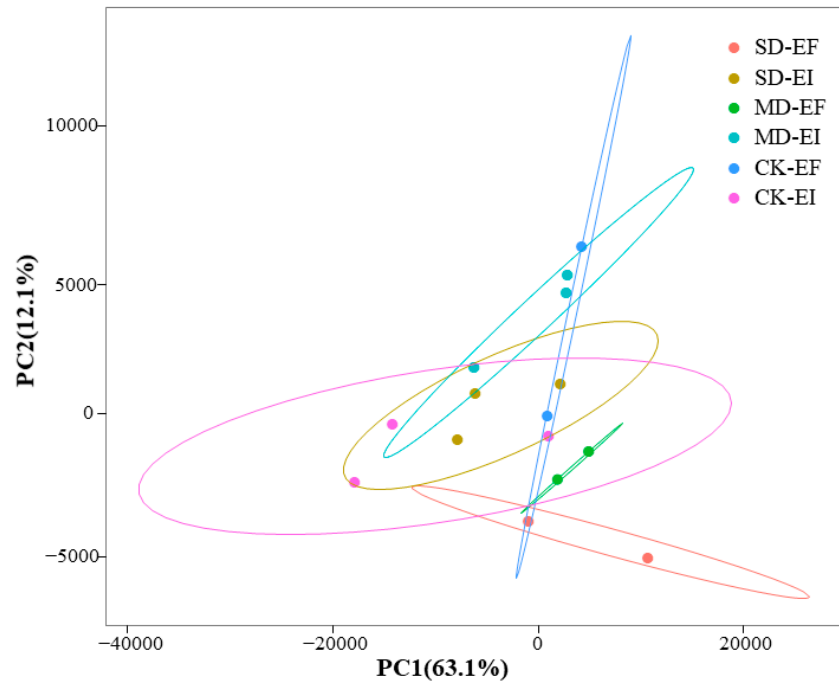

**Figure S1:** Principal component analysis (PCA) of all unigenes from *Epichloë* symbiotic (EI) and non-symbiotic (EF) *Achnatherum inebrians* plants under normal (CK), moderate (MD) and severe (SD) drought treatments.



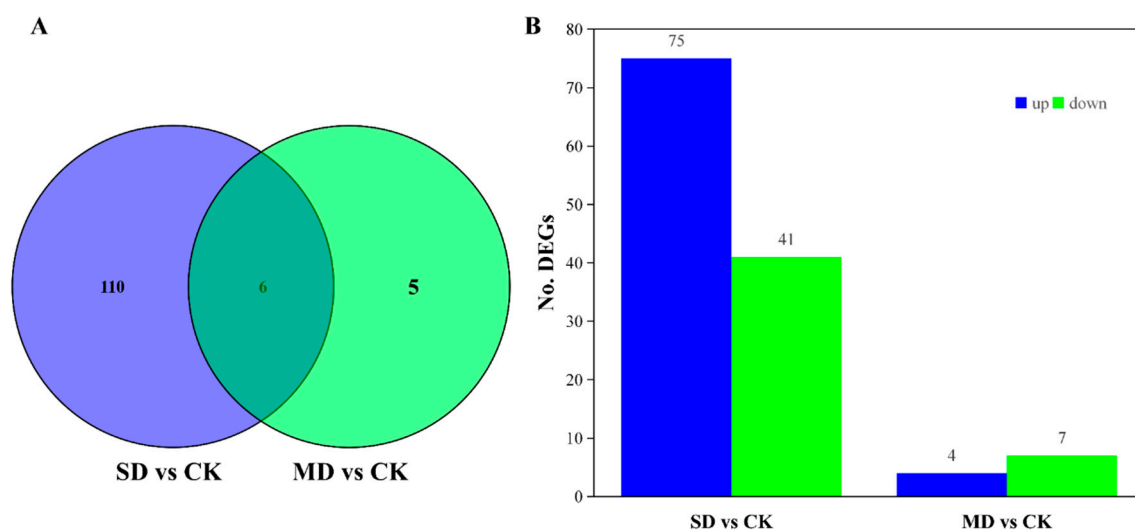

**Figure S2:** The number of up- and down-regulated differentially expressed unigenes (DEGs, FC>1.5) of *Achnatherum inebrians* plants under the several (SD) and moderate drought (MD) treatments compared to the normal (CK) treatment (DEGs in endophyte-infected plants versus endophyte-free plants).

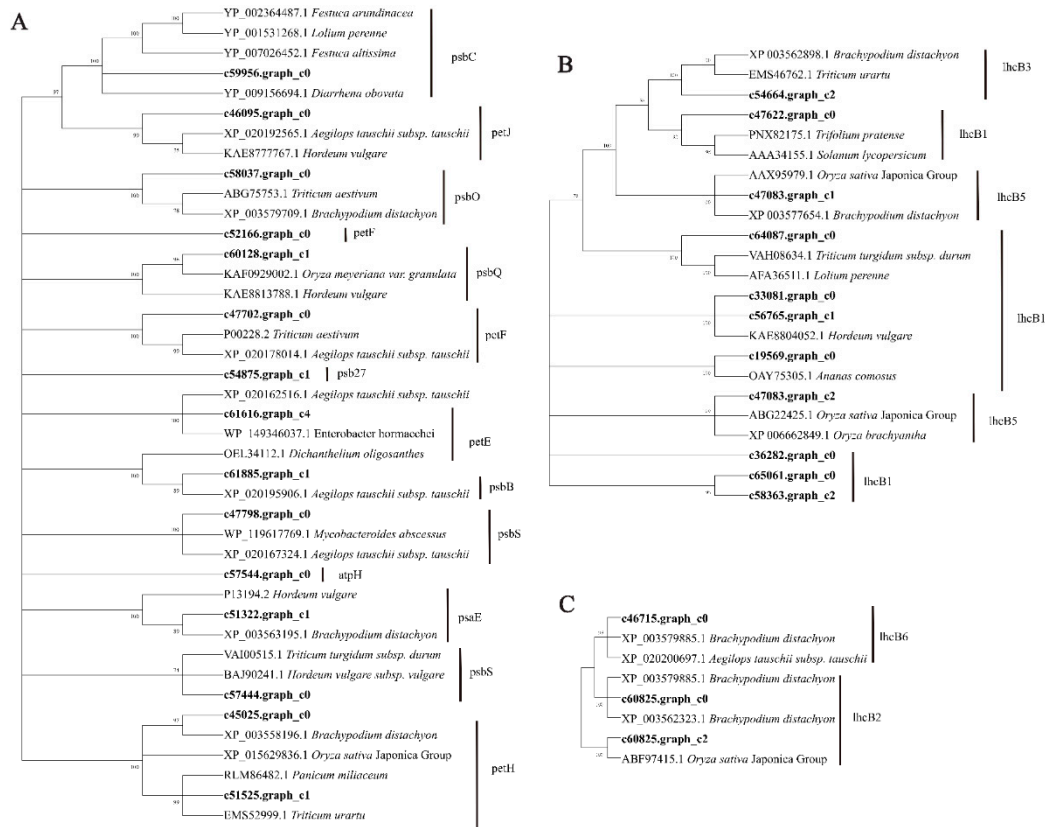

**Figure S3.** The Neighbor-Joining (NJ) tree showing the amino acid sequences of differently expressed genes (DEGs) associated with photosynthesis (A) and photosynthesis-antenna proteins (B,C) of *Achnatherum inebrians* plants. All bootstrap values >70% are shown (1000 replicates). Numbers above branches indicate the bootstrap values of the maximum likelihood analysis.

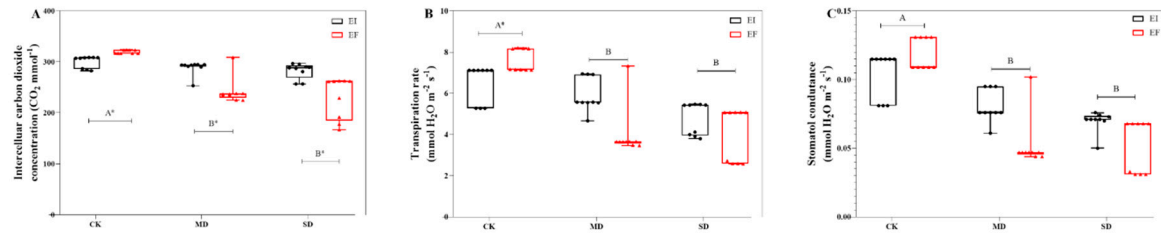

**Figure S4:** The intercellular carbon dioxide concentration (A), transpiration rate (B) and stomatal conductance (C) of *Epichloë* symbiotic (EI) and non-symbiotic (EF) *Achnatherum inebrians* plants under normal (CK), moderate (MD) and severe (SD) drought treatments. The asterisk (\*) means significant difference at  $P < 0.05$  (independent t-test) between EI and EF plants at corresponding water content at 0.05 level. The A and B mean significant differences among corresponding water content at 0.05 level.

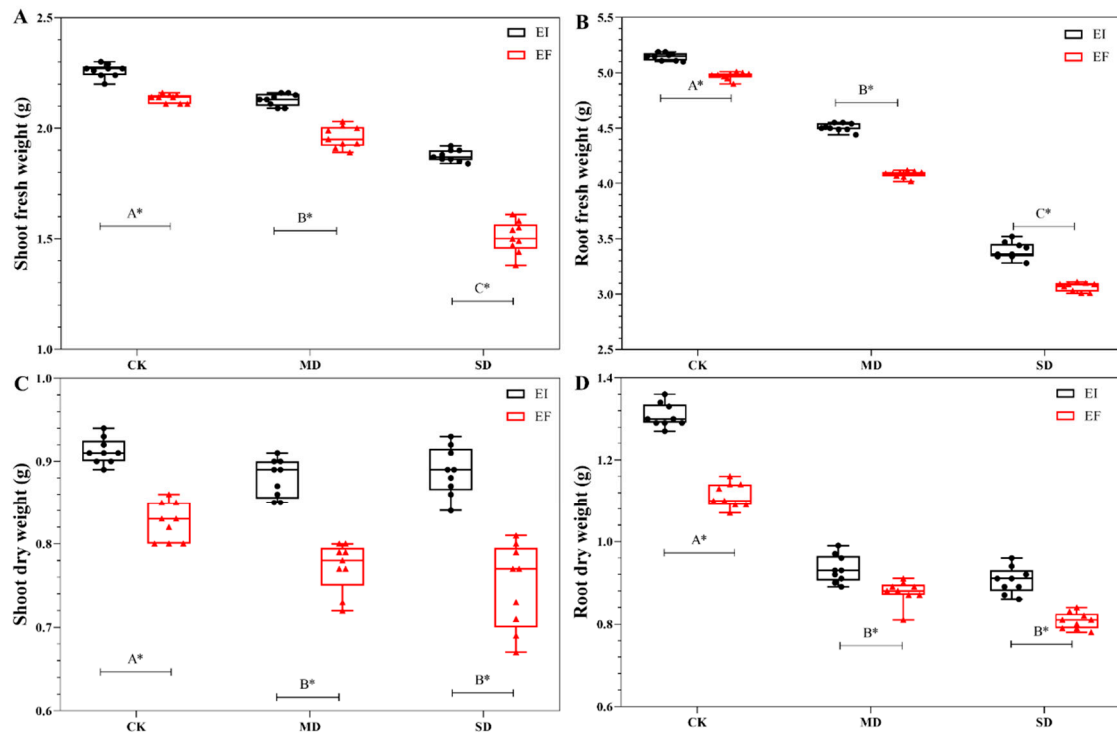

**Figure S5:** The fresh weight of shoot (a) and root (b), and dry weight of shoot (c) and root (d) of *Epichloë* symbiotic (EI) and non-symbiotic (EF) *Achnatherum inebrians* plants under normal (CK), moderate (MD) and severe (SD) drought treatments. The asterisk (\*) means significant difference at  $P < 0.05$  (independent t-test) between EI and EF plants at corresponding water content at 0.05 level. The A, B and C mean significant differences among corresponding water content at 0.05 levels.
